# Supplementary material
Source: HighWire-hosted journal article supplement (https://drc.bmj.com/content/5/1/e000366)
Supplement: inline-supplementary-material-1 [file inline-supplementary-material-1.docx]

**Supplemental Table S1:** Search terms used in the systematic review and meta-analysis on depression and the risk of amputation in people with diabetes

| **Database** | **Search terms** | **Results** |
| --- | --- | --- |
| PubMed (Up until June 22nd 2016) | 1. Diabetes mellitus (MeSH)  2. Diabet*  3. 1 or 2  4. Amputation (MeSH)  5. Amput*  6. 4 or 5  7. Depression (MeSH)  8. Depress*  9. 7 or 8  10. 3 and 6 and 9 | 67 studies |
| CINAHL (Up until June 22nd 2016) | 1. (MH "Diabetes Mellitus+") OR (MH "Diabetes Mellitus, Type 2") OR (MH "Diabetes Mellitus, Type 1+")  2. Diabet*  3. 1 or 2  4. (MH "Amputation+") OR (MH "Above-Knee Amputation") OR (MH "Amputation Stumps") OR (MH "Amputation Care")  5. Amput*  6. 4 or 5  7. (MH "Depression+") OR (MH "Self-Rating Depression Scale") OR (MH "Central Nervous System Depressants")  8. Depress*  9. 7 or 8  10. 3 and 6 and 9 | 41 studies |
| Embase, Medline (Up until June 22nd 2016) | 1. 'diabetes mellitus'/exp  2. diabet*  3. 1 or 2  4. 'amputation'/exp  5. amput*  6. 4 or 5  7. 'depression'/exp  8. depress*  9. 7 or 8  10. 3 and 6 and 9 | 196 studies |
| Cochrane Library (Up until June 22nd 2016) | 1. MeSH descriptor Diabetes Mellitus explode all trees in all MeSH products  2. Diabet*  3.1 or 2  4. [MeSH descriptor Amputation explode all trees](http://onlinelibrary.wiley.com/o/cochrane/searchHistory?mode=runquery&qnum=4)  5. [Amput*](http://onlinelibrary.wiley.com/o/cochrane/searchHistory?mode=runquery&qnum=5)  6. 4 or 5  7. MeSH descriptor: [Depression] explode all trees  8. Depress*  9. 7 or 8  10. 3 and 6 and 9 | 80 studies |
| Psyc-ARTICLES (Up until Jne 22nd 2016) | 1. (MJ "Diabetes Mellitus+") OR (MJ "Diabetes Mellitus, Type 2") OR (MJ "Diabetes Mellitus, Type 1+")  2. Diabet*  3. 1 or 2  4. (MJ "Amputation+") OR (MJ "Above-Knee Amputation") OR (MJ "Amputation Stumps") OR (MJ "Amputation Care")  5. Amput*  6. 4 or 5  7. (MJ "Depression+") OR (MJ "Self-Rating Depression Scale") OR (MJ "Central Nervous System Depressants")  8. Depress*  9. 7 or 8  10. 3 and 6 and 9 | 0 studies |
