# Supplementary material
Source: HighWire-hosted journal article supplement (https://drc.bmj.com/content/5/1/e000366)
Supplement: inline-supplementary-material-2 [file inline-supplementary-material-2.docx]

**Table S2:** Inclusion/exclusion criteria for the systematic review and meta-analysis on depression and the risk of amputation in people with diabetes

| **Selection Criteria** | **Inclusion Criteria** | **Exclusion Criteria** |
| --- | --- | --- |
| Population | - Patients with a diagnosis of type 1 or type 2 diabetes  - Comorbid diagnosis of depression  - Any age | Patients with gestational diabetes or impaired glucose tolerance |
| Intervention / Exposure | - Randomized control trials and observational studies (cohort, case studies, cross-sectional)  - Study from any country  - Published in English  - Study from any year  - Exposure of comorbid depression measured before diabetes related amputation. | - Review articles  - Chart reviews / Case series  - Exposure of comorbid depression measured after diabetes related amputation. |
| Comparison | - Patients with a diagnosis of type 1 or type 2 diabetes  - No comorbid diagnosis of depression |  |
| Outcome | - Patients with an incident of non-trauma related amputation | Studies on diabetic foot or mortality and not amputation |
